# Supplementary material for: Prediction of superconductivity in a series of tetragonal transition metal dichalcogenides
Source: Royal Society of Chemistry journal article supplement (doi:10.1039/d4mh00141a), 2024-01-01
Supplement: d4mh00141a1.pdf [file d4mh00141a1.pdf]

Electronic Supplementary Information for

**Prediction of superconductivity in a series of tetragonal transition  
metal dichalcogenides**

Jiale Liu, Huidong Wang, Xiaojun Shi, and Xiaoming Zhang\*

*College of Physics and Optoelectronic Engineering, Ocean University of China,  
Qingdao, Shandong 266100, China*

\*Correspondence to: [zxm@ouc.edu.cn](mailto:zxm@ouc.edu.cn)

**Content**

|                                                                                                               |    |
|---------------------------------------------------------------------------------------------------------------|----|
| <b>Section 1.</b> Details of first-principles calculations on <i>d</i> Lieb-MS <sub>2</sub> monolayer.....    | 2  |
| <b>Section 2.</b> The magnetic property of <i>d</i> Lieb-MnS <sub>2</sub> monolayer.....                      | 8  |
| <b>Section 3.</b> Details of estimating the superconductivity of <i>d</i> Lieb-MS <sub>2</sub> monolayer..... | 11 |
| <b>Section 4.</b> The feasibility of exfoliating <i>d</i> Lieb-MS <sub>2</sub> monolayer.....                 | 13 |
| <b>References</b> .....                                                                                       | 18 |

## Section 1. Details of first-principles calculations on *d*Lieb-MS<sub>2</sub> monolayer

We employed the Quantum ESPRESSO (QE) package <sup>1</sup> to calculate the phonon spectra of *d*Lieb-MS<sub>2</sub> monolayers within the framework of density functional theory (DFT) <sup>2,3</sup> and density functional perturbation theory (DFPT) <sup>4</sup>. The generalized gradient approximation (GGA) in the functional type of Perdew-Burke-Ernzerh (PBE) <sup>5</sup> was employed for the PAW pseudopotential <sup>6</sup> and the energy cutoff was set to 100 Ry. The crystal structures of *d*Lieb-MS<sub>2</sub> monolayers were fully optimized with a convergence threshold of 10<sup>-4</sup> for energy and 10<sup>-3</sup> for force under the **k**-point sampling of 20×20×1 in Brillouin zone. The population of electrons was determined by the gaussian smearing with the smearing type of Methfessel-Paxton first-order spreading and the smearing width of 0.01 Ry. The dynamic matrix and phonon frequency of optimized *d*Lieb-MS<sub>2</sub> were computed on a 10×10×1 **q**-point sampling in Brillouin zone.

The Vienna *Ab initio* Simulation Package (VASP) <sup>7</sup> was employed to calculate the elastic constants and electronic properties of *d*Lieb-MS<sub>2</sub> monolayers based on the DFT <sup>2,3</sup>, where GGA-PBE <sup>5</sup> and the PAW pseudopotential <sup>6</sup> were used. The energy cutoff was set to 500 eV and the spin-orbit coupling effect was included. The crystal structures of *d*Lieb-MS<sub>2</sub> monolayers were fully optimized with the convergence criteria of 10<sup>-5</sup> eV for energy and 0.01 eV/Å for force. The method of Methfessel-Paxton first-order spreading with the smearing width of 0.10 eV was employed to determine the occupancies of electrons in metallic bands. A uniform 30×30×1 Monkhorst-Pack **k**-point sampled in Brillouin zone was used to perform the structural relaxation and self-consistent calculations. The self-consistent calculations enable us to obtain the density-of-states (DOS) and spin-textures patterns, which were followed by non-self-consistent calculations to calculate the electronic band structures along high-symmetry directions.

The thermodynamic stability of screened *d*Lieb-MS<sub>2</sub> monolayer at finite-temperature has been checked by performing *ab initio* molecular dynamics simulations (AIMD) <sup>8</sup> based on the VASP <sup>7</sup>, which lasted 5000 fs with the time step of 1 fs under the NVT ensemble. The AIMDs were simulated at the temperatures of 50, 100, 150, 200, 250, and 300 K, which were controlled by the Nose-Hoover thermostat. We only show the simulated results of maximum temperature at which the screened *d*Lieb-MS<sub>2</sub> monolayer can be stabilized. To make a reliable comparison with other transition metal dichalcogenides (TMDCs), the total energies of screened *d*Lieb-MS<sub>2</sub> (M=Zr, Nb, Mn, Fe, Re, Os) monolayers and related TMDCs monolayers (1T-ZrS<sub>2</sub>, 1T-MnS<sub>2</sub>, 1T-NbS<sub>2</sub>, 1H-NbS<sub>2</sub>, 1T'-ReS<sub>2</sub>, 1T-MoS<sub>2</sub>, 1H-MoS<sub>2</sub>, 1T-WS<sub>2</sub>, 1H-WS<sub>2</sub>, and OsS<sub>2</sub> formed by pentagonal rings) were calculated by using VASP <sup>7</sup> under the **k**-points sampling with the uniform resolution of 0.04×2π Å<sup>-1</sup> in Brillouin zone.

**Table S1.** The elastic constants  $C_{ij}$  of *d*Lieb-MS<sub>2</sub> monolayers.

|                                | $C_{11}$ (N/m) | $C_{12}$ (N/m) | $C_{66}$ (N/m) |
|--------------------------------|----------------|----------------|----------------|
| <i>d</i> Lieb-ZrS <sub>2</sub> | 31.8           | 2.3            | 2.7            |
| <i>d</i> Lieb-NbS <sub>2</sub> | 25.3           | 11.0           | 6.6            |
| <i>d</i> Lieb-MnS <sub>2</sub> | 32.6           | 4.1            | 9.0            |
| <i>d</i> Lieb-FeS <sub>2</sub> | 38.8           | 15.1           | 6.2            |
| <i>d</i> Lieb-ReS <sub>2</sub> | 33.4           | 9.7            | 9.5            |
| <i>d</i> Lieb-OsS <sub>2</sub> | 38.4           | 16.1           | 4.1            |

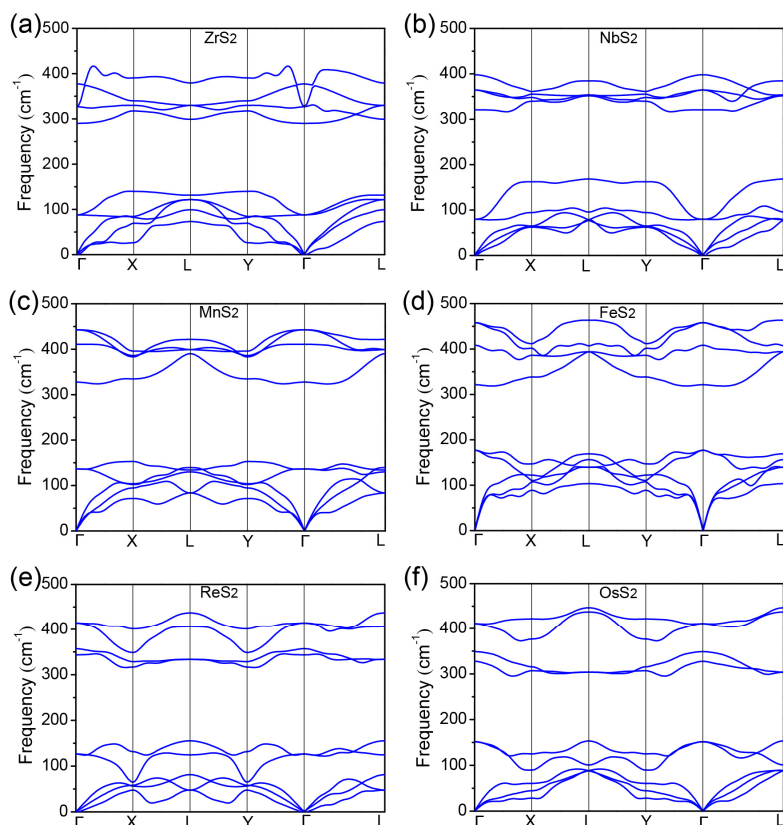

**Figure S1.** The phonon spectra of (a) *d*Lieb-ZrS<sub>2</sub>, (b) *d*Lieb-NbS<sub>2</sub>, (c) *d*Lieb-MnS<sub>2</sub>, (d) *d*Lieb-FeS<sub>2</sub>, (e) *d*Lieb-ReS<sub>2</sub>, and (f) *d*Lieb-OsS<sub>2</sub>.

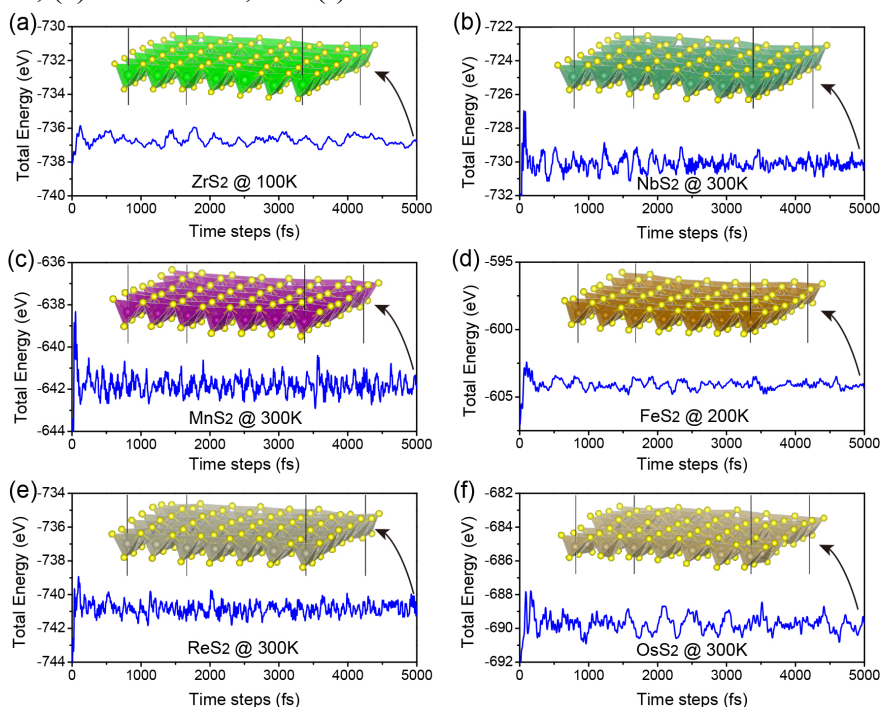

**Figure S2.** The variations of total energy during the AIMDs for the (a) *d*Lieb-ZrS<sub>2</sub> at 100 K, (b) *d*Lieb-NbS<sub>2</sub> at 300 K, (c) *d*Lieb-MnS<sub>2</sub> at 300 K, (d) *d*Lieb-FeS<sub>2</sub> at 200 K, (e) *d*Lieb-ReS<sub>2</sub> at 300 K, and (f) *d*Lieb-OsS<sub>2</sub> at 300 K. The insets are the crystal structures after simulating 5000 fs.

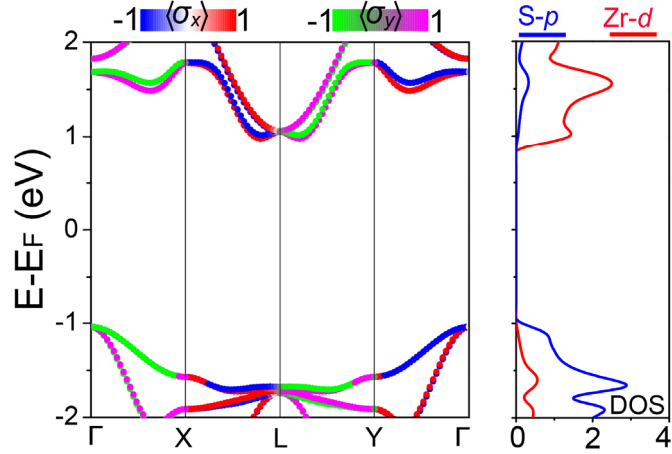

**Figure S3.** The band structure (left panel) and projected DOS (right panel) of *d*Lieb-ZrS<sub>2</sub>. The colours on the band lines along the  $\Gamma$ -X and L-Y paths represent the expectation values  $\langle\sigma_y\rangle$ , while that along the X-L and Y- $\Gamma$  paths represent the expectation values  $\langle\sigma_x\rangle$ . The projected DOS of Zr-*d* and S-*p* orbitals was plotted by using red and blue coloured lines, respectively.

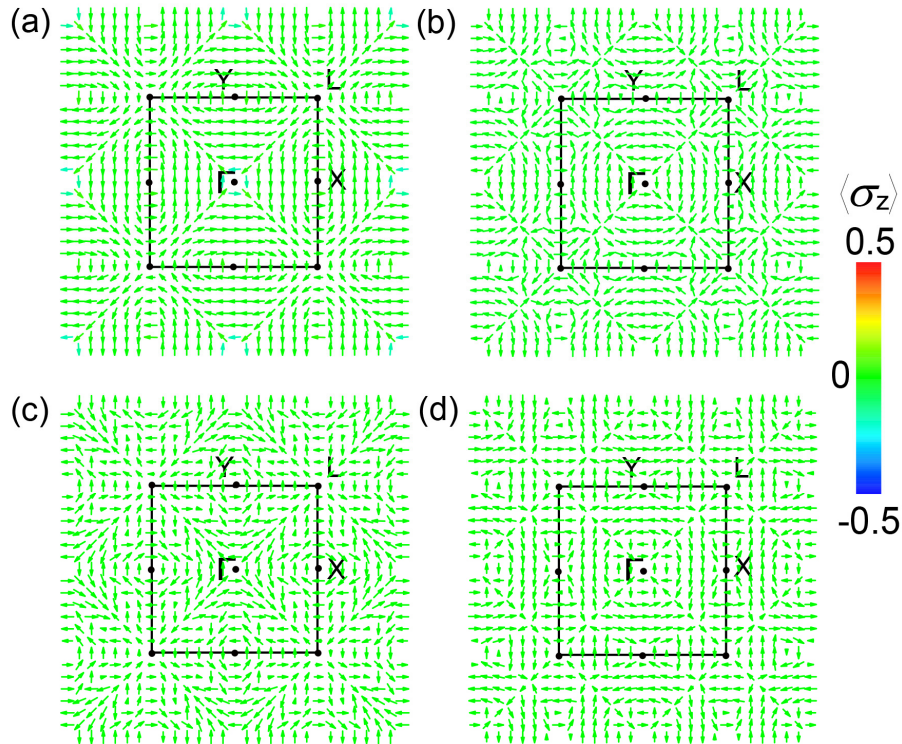

**Figure S4.** The spin texture patterns for the lowest band crossing the Fermi level of (a) *d*Lieb-NbS<sub>2</sub>, (b) *d*Lieb-FeS<sub>2</sub>, (c) *d*Lieb-ReS<sub>2</sub>, and (d) *d*Lieb-OsS<sub>2</sub>. The in-plane spin components are presented by arrows, while the colour represents out-of-plane component of spin orientation.

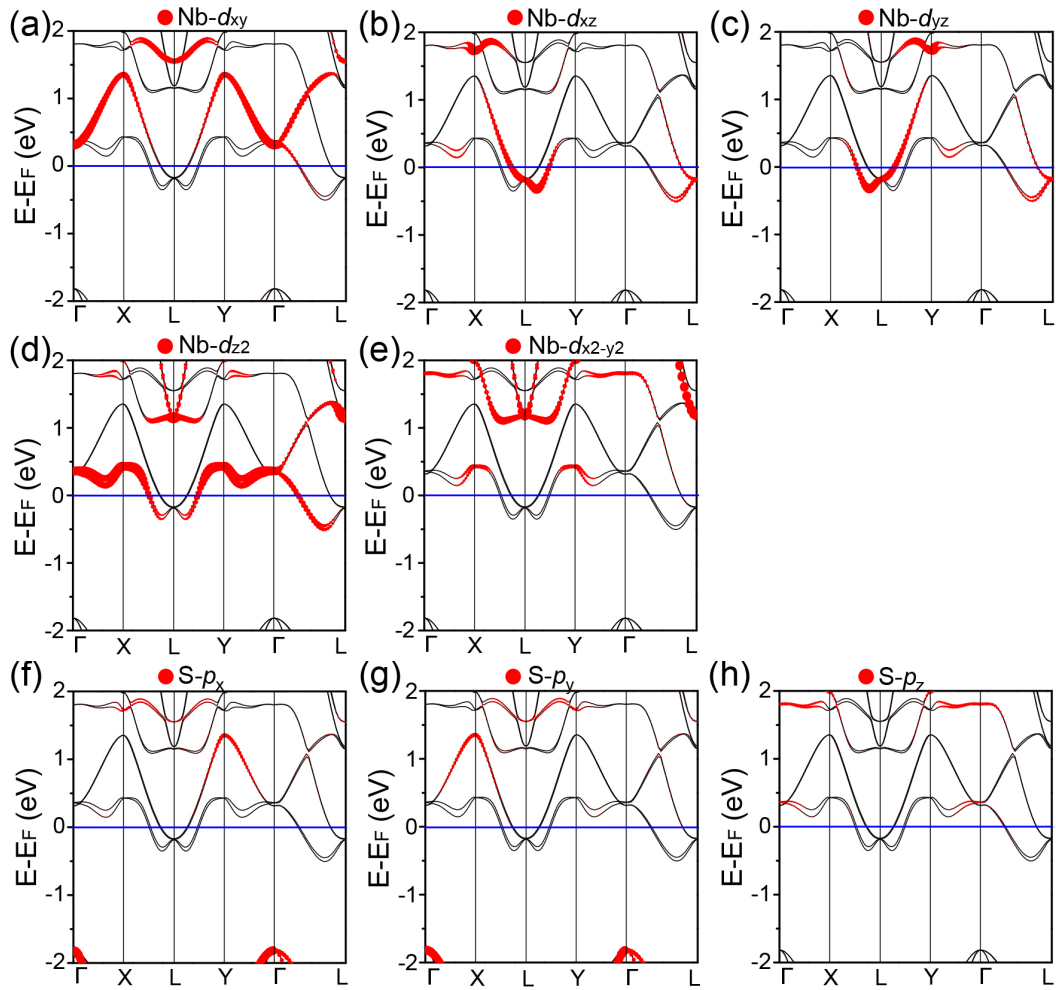

**Figure S5.** The orbital resolved band structures of *d*Lieb-NbS<sub>2</sub> with the contribution of (a) Nb-*d*<sub>xy</sub>, (b) Nb-*d*<sub>xz</sub>, (c) Nb-*d*<sub>yz</sub>, (d) Nb-*d*<sub>z2</sub>, (e) Nb-*d*<sub>x2-y2</sub>, (f) S-*p*<sub>x</sub>, (g) S-*p*<sub>y</sub>, and (h) S-*p*<sub>z</sub> orbital being drawn proportionally to the magnitude of red dots. The Fermi energy is set to zero.

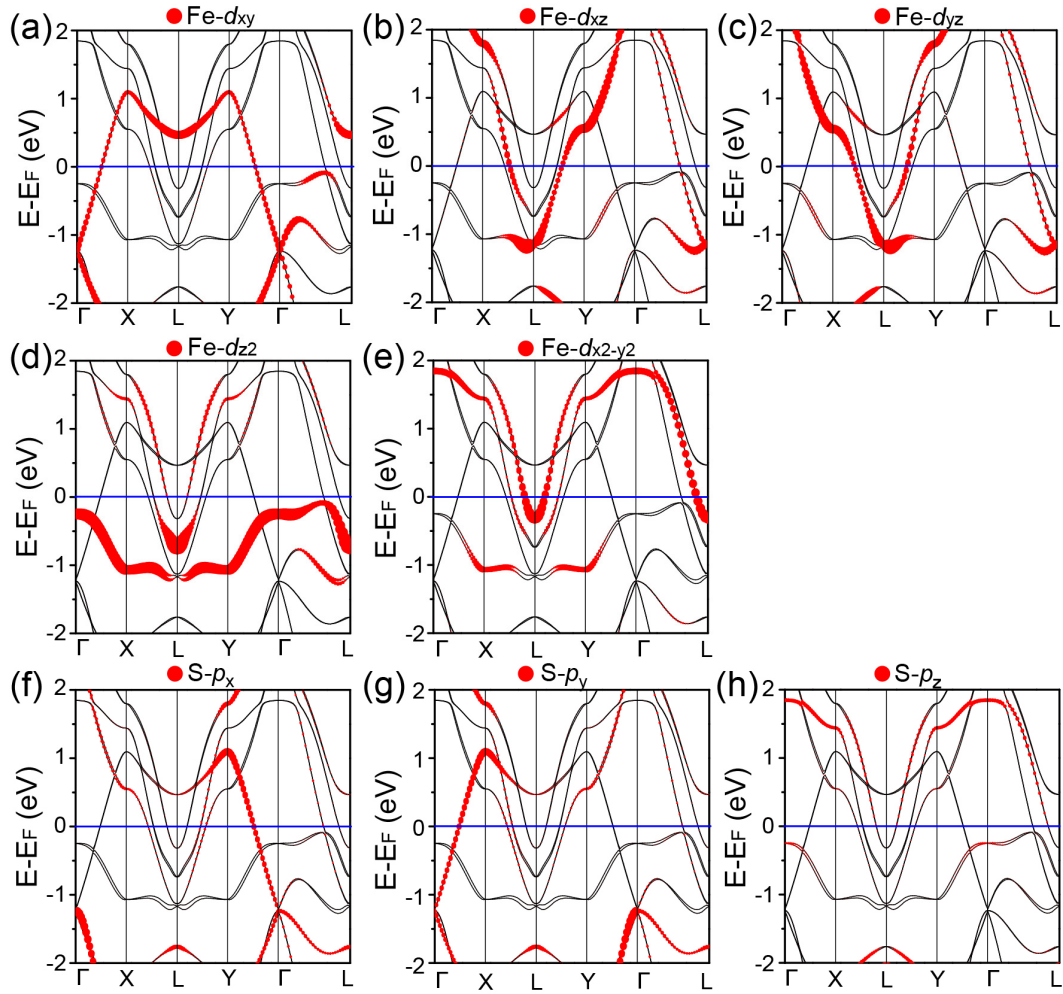

**Figure S6.** The orbital resolved band structures of *d*Lieb-FeS<sub>2</sub> with the contribution of (a) Fe-*d*<sub>xy</sub>, (b) Fe-*d*<sub>xz</sub>, (c) Fe-*d*<sub>yz</sub>, (d) Fe-*d*<sub>z<sup>2</sup></sub>, (e) Fe-*d*<sub>x<sup>2</sup>-y<sup>2</sup></sub>, (f) S-*p*<sub>x</sub>, (g) S-*p*<sub>y</sub>, and (h) S-*p*<sub>z</sub> orbital being drawn proportionally to the magnitude of red dots. The Fermi energy is set to zero.

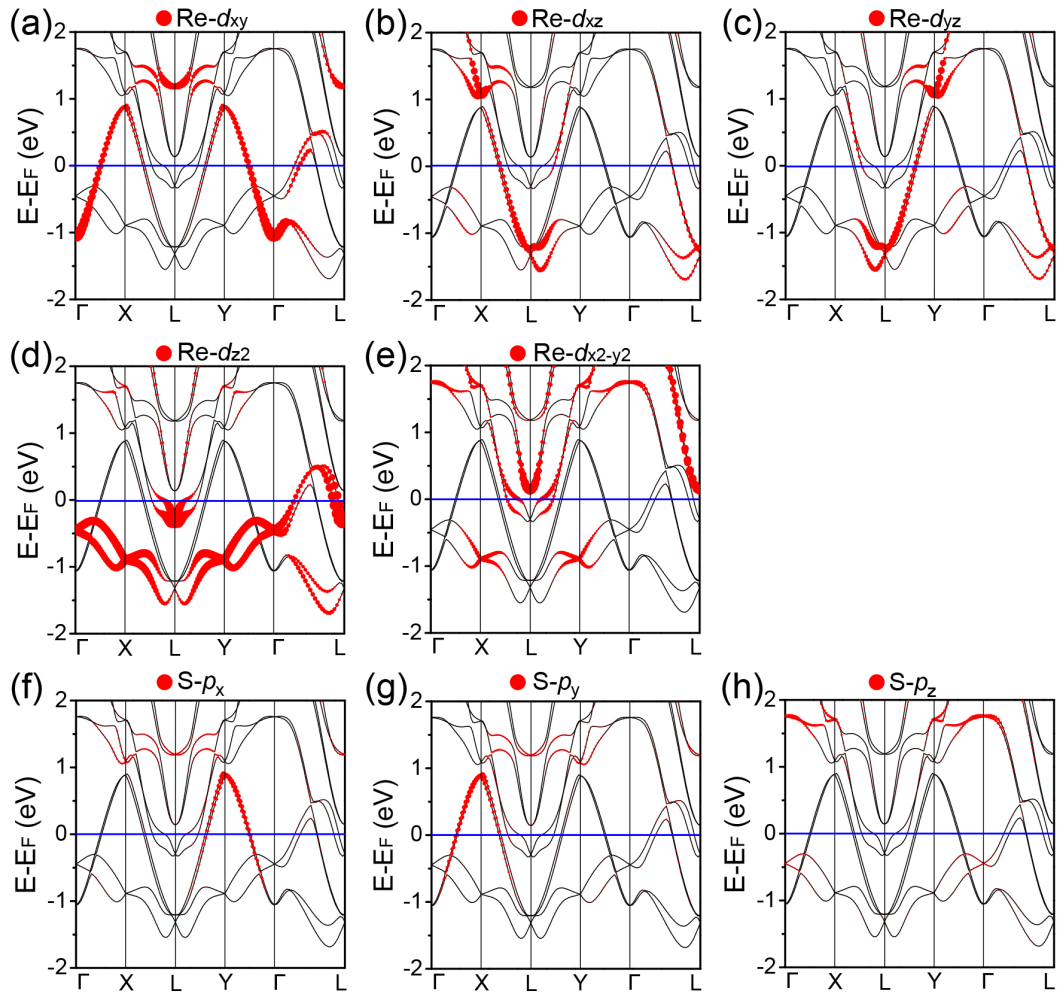

**Figure S7.** The orbital resolved band structures of *d*Lieb-ReS<sub>2</sub> with the contribution of (a) Re-*d*<sub>xy</sub>, (b) Re-*d*<sub>xz</sub>, (c) Re-*d*<sub>yz</sub>, (d) Re-*d*<sub>z<sup>2</sup></sub>, (e) Re-*d*<sub>x<sup>2</sup>-y<sup>2</sup></sub>, (f) S-*p*<sub>x</sub>, (g) S-*p*<sub>y</sub>, and (h) S-*p*<sub>z</sub> orbital being drawn proportionally to the magnitude of red dots. The Fermi energy is set to zero.

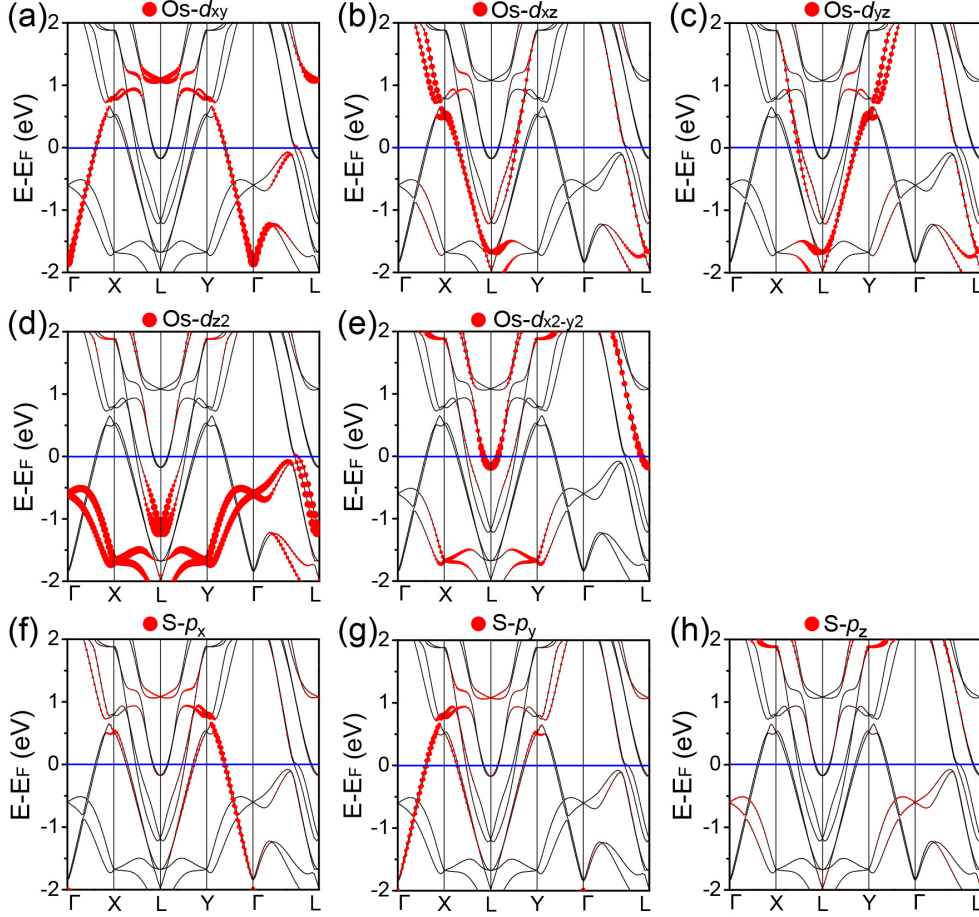

**Figure S8.** The orbital resolved band structures of  $d\text{Lieb-OsS}_2$  with the contribution of (a)  $\text{Os-}d_{xy}$ , (b)  $\text{Os-}d_{xz}$ , (c)  $\text{Os-}d_{yz}$ , (d)  $\text{Os-}d_{z^2}$ , (e)  $\text{Os-}d_{x^2-y^2}$ , (f)  $\text{S-}p_x$ , (g)  $\text{S-}p_y$ , and (h)  $\text{S-}p_z$  orbital being drawn proportionally to the magnitude of red dots. The Fermi energy is set to zero.

## Section 2. The magnetic property of $d\text{Lieb-MnS}_2$ monolayer

To study the magnetic properties of the screened  $d\text{Lieb-MS}_2$  ( $M=\text{Zr, Nb, Mn, Fe, Re, Os}$ ) monolayers, we carry out spin-polarized calculations by assuming an initial non-zero magnetic moment on M atoms. The method of Methfessel-Paxton first-order spreading was employed to determine the occupancies of electrons in metallic bands. We have carefully checked the convergence of magnetic property by using different width of the smearing under a series of  $\mathbf{k}$ -points sampling in Brillouin zone. Our calculations indicate only the  $d\text{Lieb-MnS}_2$  is magnetic, which is well converged when the  $\mathbf{k}$ -points sampling exceeding  $30 \times 30 \times 1$  and the magnetic moment converged around  $\sim 0.8 \mu_{\text{B}}$  per  $\text{MnS}_2$  unit (Fig. S9). The existence of magnetism in  $d\text{Lieb-MnS}_2$  and the absence of magnetism in  $d\text{Lieb-NbS}_2$ ,  $d\text{Lieb-FeS}_2$ , and  $d\text{Lieb-ReS}_2$  are also mentioned in the Computational 2D Materials Database<sup>9</sup>. Since the width of the smearing have little influence on the magnetic propriety when the  $\mathbf{k}$ -points sampling exceeding  $30 \times 30 \times 1$  (Fig. S9), the smearing width of 0.10 eV is employed as an example to perform following calculations on the magnetic  $d\text{Lieb-MnS}_2$  monolayer.



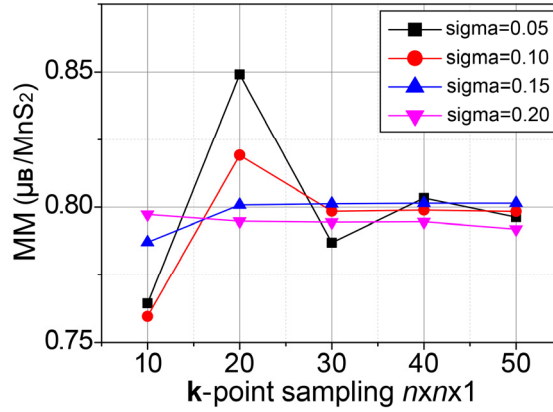

**Figure S9.** The dependence of magnetic moment (MM) per  $\text{MnS}_2$  unit on the  $\mathbf{k}$ -points sampling  $n \times n \times 1$  and on the width ( $\sigma=0.05, 0.10, 0.15, 0.20$  eV) of smearing.

The magnetic ground state of  $d\text{Lieb-MnS}_2$  was determined by total energy calculations, and the calculated total energy of magnetic  $d\text{Lieb-MnS}_2$  monolayer is 5.2 meV/atom lower than that of  $d\text{Lieb-MnS}_2$  without considering magnetism. The electronic band structure (Fig. S10a) and DOS (Fig. S10b) indicate the  $d\text{Lieb-MnS}_2$  is a magnetic metal, because of both the up-spin and down-spin polarized electronic states crossing with the Fermi level. The iso-surface of the spin density for the magnetic  $d\text{Lieb-MnS}_2$  (Fig. S10c) shows that the Mn atoms are highly spin-polarized and contribute mainly to the non-zero magnetic moment. The band structure of  $d\text{Lieb-MnS}_2$  monolayer with considering spin-orbit coupling was plotted in Fig. S10d, which is qualitatively consistent with that calculated without spin-orbit coupling (Fig. S10a).

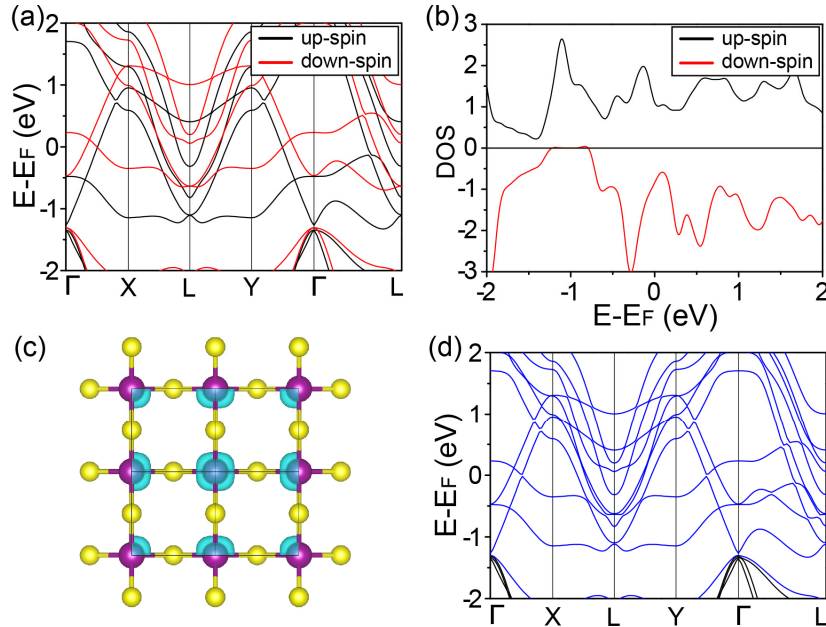

**Figure S10.** (a, b) The electronic band structure (a) and DOS (b) of magnetic  $d\text{Lieb-MnS}_2$  monolayer. The up-spin and down-spin components are respectively plotted by using black and red lines. (c) The real-space distribution of spin density. (d) The band structure of magnetic  $d\text{Lieb-MnS}_2$  monolayer with considering spin-orbit coupling.

To reveal the origin of the magnetism in  $d\text{Lieb-MnS}_2$  monolayer, we compare the total DOS of  $d\text{Lieb-MnS}_2$  without considering magnetism to that of nonmagnetic  $d\text{Lieb-MS}_2$  ( $M = \text{Nb, Fe, Re, Os}$ ) monolayers in Fig. S11a. One can clearly see the  $d\text{Lieb-MnS}_2$  possesses the largest DOS at the Fermi level, which is related to the band lines of localized  $3d_{z^2}$ -orbitals crossing with the Fermi level (Fig. S11b). The largest DOS of  $d\text{Lieb-MnS}_2$  at the Fermi level can be greatly reduced by introducing magnetism (inset of Fig. S11a). Together with the odd number of electrons per Mn atom, the emergence of magnetism in  $d\text{Lieb-MnS}_2$  can be attributed to the Stoner effect<sup>10, 11</sup>, and a large DOS of localized  $d$ -orbitals at the Fermi level tends to inducing magnetic instability. This can be demonstrated by analyzing the magnetic property of  $d\text{Lieb-MnS}_2$  under different biaxial compressive strain. The total DOS of  $d\text{Lieb-MnS}_2$  without considering magnetism is basically unchanged when the magnitude of compressive strain is smaller than 2% and decreases when increasing the magnitude of compressive strain from 2% (Fig. S11c). Then the calculations with considering spin polarization were performed on the compressed  $d\text{Lieb-MnS}_2$  to evaluate the magnetic moment (Fig. S11d), which show that the magnetism can be well maintained when the magnitude of compressive strain is smaller than 2%, and will transform to non-magnetic state when further increasing the magnitude of compressive strain from 2%. The closely correlation between the magnetism and the magnitude of DOS at the Fermi level indeed reveals that the Stoner effect plays important role.

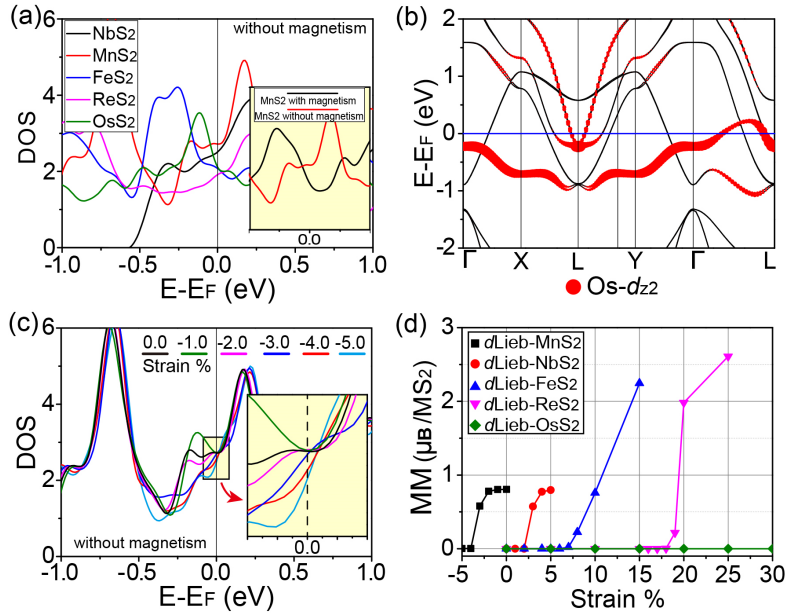

**Figure S11.** (a) The comparison between the total DOS of  $d\text{Lieb-MnS}_2$  without considering magnetism and that of nonmagnetic  $d\text{Lieb-MS}_2$  ( $M = \text{Nb, Fe, Re, Os}$ ) monolayers. Inset plots the comparison between the total DOS of  $d\text{Lieb-MnS}_2$  with and without considering magnetism. (b) The band structures of  $d\text{Lieb-MnS}_2$  without considering magnetism, where the contribution of Mn- $d_{z^2}$  is drawn proportionally to the magnitude of red dots. (c) The variation of the total DOS of  $d\text{Lieb-MnS}_2$  without considering magnetism under different biaxial compressive strain. (d) The magnetic moment (MM) per  $\text{MS}_2$  unit under different biaxial strain for the  $d\text{Lieb-MS}_2$ .

To further confirm above analysis, we propose the Stoner magnetism can be induced and controlled in other metallic  $d$ Lieb-MS<sub>2</sub> monolayers by applying biaxial tensile strains (Fig. S11d), which plays the role of making the  $d$ -orbitals of M atom more localized and thus induce the magnetic instability. Specifically, one can see the magnetic moment of  $d$ Lieb-NbS<sub>2</sub> at the tensile strain of 5% is nearly equal to that of equilibrium  $d$ Lieb-MnS<sub>2</sub>. This fact can be understood from that the Nb atoms possesses odd number of electrons and the localized  $4d_{z^2}$ -orbitals also form narrow band lines crossing with Fermi level (Fig. S5). For the  $d$ Lieb-ReS<sub>2</sub> with odd number of electrons, a larger tensile strain is demanded to introducing the magnetism due to the  $5d_{z^2}$ -orbitals of Re atoms are less localized, which can be seen from the its band structures (Fig. S7). For the  $d$ Lieb-FeS<sub>2</sub> and  $d$ Lieb-OsS<sub>2</sub> with even number of electrons, the band lines of  $d_{z^2}$ -orbitals no longer cross with the Fermi level (Fig. S6 and S8). Despite this, the tensile strain could also introduce the Stoner magnetism in  $d$ Lieb-FeS<sub>2</sub> due to the localized  $3d$ -orbitals, while the less localized  $5d$ -orbitals of Os still preserve the time-reversal symmetry of  $d$ Lieb-OsS<sub>2</sub> even if the tensile strain reach up to 30% (Fig. S11d). Furthermore, the dependence of magnetic property on the tensile strain also demonstrate that the  $d$ Lieb-MS<sub>2</sub> (M=Nb, Fe, Re, Os) monolayers are indeed nonmagnetic metals at their equilibrium crystal structures (Fig. S11d), which is compatible with the existence of superconductivity.

### Section 3. Details of estimating the superconductivity of $d$ Lieb-MS<sub>2</sub> monolayer

During the calculations of phonon spectra within the framework of DFPT<sup>4</sup>, the electron-phonon coupling (EPC) strength was estimated for the metallic  $d$ Lieb-MS<sub>2</sub> (M=Nb, Re, Fe, Os) monolayer by using the QE package<sup>1</sup> based on the DFT<sup>2,3</sup>. The dynamic matrix and phonon frequency of optimized  $d$ Lieb-MS<sub>2</sub> were computed on a  $10 \times 10 \times 1$   $\mathbf{q}$ -point mesh with a  $20 \times 20 \times 1$   $\mathbf{k}$ -point sampling, and a finer  $40 \times 40 \times 1$   $\mathbf{k}$ -point grid is used in the EPC calculations. Specifically, the EPC was calculated via  $\lambda(\omega) = 2 \int_0^\omega d\omega' \frac{\alpha^2 F(\omega')}{\omega'}$ <sup>12</sup>, where the Eliashberg spectral function  $\alpha^2 F(\omega)$  is defined by  $\alpha^2 F(\omega) = \frac{1}{2} \sum_{\mathbf{q}v} w_{\mathbf{q}} \omega_{\mathbf{q}v} \lambda_{\mathbf{q}v} \delta(\omega - \omega_{\mathbf{q}v})$ . The momentum  $\mathbf{q}$  and mode  $v$  resolved EPC  $\lambda_{\mathbf{q}v}$  is given by  $\lambda_{\mathbf{q}v} = \frac{\hbar}{2m_0 N_F \omega_{\mathbf{q}v}^2} \sum_{mn\mathbf{k}} w_{\mathbf{k}} |\langle \psi_{m\mathbf{k}+\mathbf{q}} | \partial_{\mathbf{q}v} V | \psi_{n\mathbf{k}} \rangle|^2 \delta(\epsilon_{n\mathbf{k}}) \delta(\epsilon_{m\mathbf{k}+\mathbf{q}})$  and shown in Fig. S12. The  $\psi_{n\mathbf{k}}$  is the electronic wavefunction for band  $n$ , wavevector  $\mathbf{k}$ , and eigenvalue  $\epsilon_{n\mathbf{k}}$ .  $\partial_{\mathbf{q}v} V$  is the derivative of self-consistent potential associated with the phonon wavevector  $\mathbf{q}$ , phonon branch  $v$  and phonon frequency  $\omega_{\mathbf{q}v}$ .  $\delta$  is the Dirac delta function. The  $w_{\mathbf{k}}$  and  $w_{\mathbf{q}}$  are respectively the Brillouin zone weight of  $\mathbf{k}$ -point and  $\mathbf{q}$ -point.  $m_0$  is the convenient reference mass and  $N_F$  is DOS at the Fermi level. The total EPC  $\lambda$  corresponds to the value of  $\lambda(\omega_{\max})$  with the  $\omega_{\max}$  being the maximum of phonon frequency.

We employ the Allen-Dynes-modified McMillan equation<sup>13, 14</sup> to evaluate the superconducting transition temperatures  $T_C$  with the Coulomb pseudopotential  $\mu^* = 0.1$ . For the  $d$ Lieb-MS<sub>2</sub> with the total EPC  $\lambda < 1.5$ , the Allen-Dynes-modified McMillan equation without correction factors was employed, which is given by

$$T_C = \frac{\omega_{\log}}{1.2} \exp \left[ \frac{-1.04 \times (1 + \lambda)}{\lambda - \mu^* \times (1 + 0.62 \times \lambda)} \right]$$

where the logarithmically averaged frequency  $\omega_{\log}$  is defined by  $\omega_{\log} = \exp \left[ \frac{2}{\lambda} \int \frac{\alpha^2 F(\omega)}{\omega} \log(\omega) d\omega \right]$ . This equation is the most widely used approach for the calculation of  $T_C$  from first principles<sup>15</sup>. For the  $d$ Lieb-MS<sub>2</sub> with the total EPC  $\lambda > 1.5$ , the correction factors  $f_1$  and  $f_2$  were included in the Allen-Dynes-modified McMillan equation:

$$T_C = \frac{f_1 f_2 \omega_{\log}}{1.2} \exp \left[ \frac{-1.04 \times (1 + \lambda)}{\lambda - \mu^* \times (1 + 0.62 \times \lambda)} \right]$$

with  $f_1 = \sqrt[3]{1 + \left( \frac{\lambda}{2.46(1+3.8\mu^*)} \right)^2}$ ,  $f_2 = 1 + \frac{\left( \frac{\bar{\omega}_2}{\omega_{\log}} - 1 \right) \lambda^2}{\lambda^2 + \left[ 1.82(1+6.3\mu^*) \frac{\bar{\omega}_2}{\omega_{\log}} \right]^2}$ . Here the mean

square frequency  $\bar{\omega}_2$  is defined by  $\bar{\omega}_2 = \sqrt{\frac{2}{\lambda} \int_0^\infty \alpha^2 F(\omega) \omega d\omega}$ . This extended form of Allen-Dynes-modified McMillan equation is so accurate that the predicted  $T_C$  is usually identical to those obtained by the solution of the Eliashberg equations for conventional superconductors<sup>15</sup>.

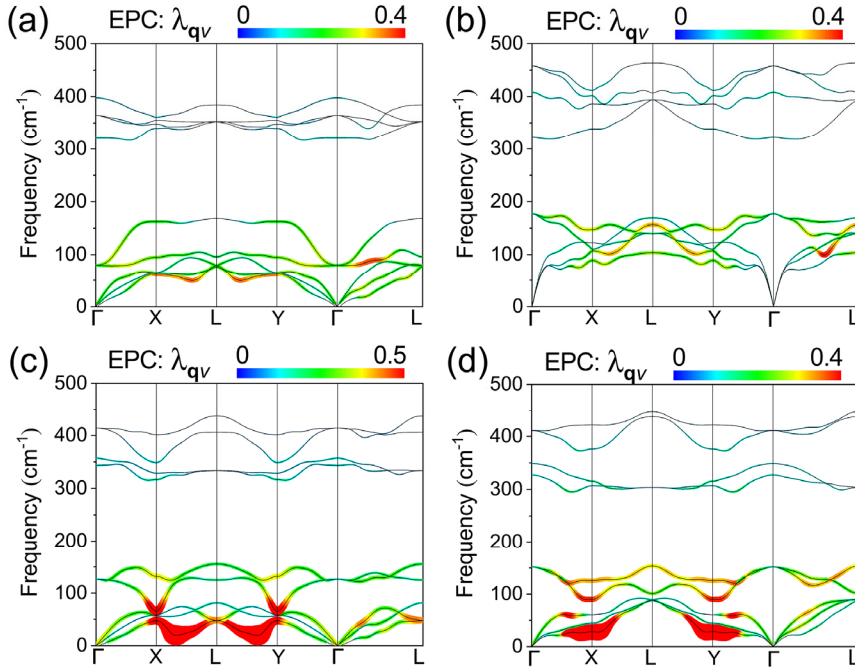

**Figure S12.** The phonon spectra of (a)  $d$ Lieb-NbS<sub>2</sub>, (b)  $d$ Lieb-FeS<sub>2</sub>, (c)  $d$ Lieb-ReS<sub>2</sub>, and (d)  $d$ Lieb-OsS<sub>2</sub>, where the coloured dots are drawn proportionally to the magnitude of momentum  $\mathbf{q}$  and mode  $\nu$  resolved EPC  $\lambda_{\mathbf{q}\nu}$ .

## Section 4. The feasibility of exfoliating $d$ Lieb-MS<sub>2</sub> monolayer

We here propose the  $d$ Lieb-MS<sub>2</sub> monolayer can be exfoliated from its bulk counterpart, based on first-principles calculating the formation energy  $E_{\text{form}}$  of bulk  $d$ Lieb-MS<sub>2</sub> and the exfoliation energy  $E_{\text{XF}}$  of  $d$ Lieb-MS<sub>2</sub> monolayer from  $d$ Lieb-MS<sub>2</sub> slab. The first-principles calculations were performed by including van der Waals interaction, which is described by DFT-D3 functional with Becke-Jonson damping and implemented in the VASP<sup>7</sup>. The GGA-PBE<sup>5</sup> was employed for the PAW pseudopotential<sup>6</sup> and the energy cutoff was set to 500 eV. The  $\mathbf{k}$ -points with the resolution of  $0.04 \times 2\pi \text{ \AA}^{-1}$  were sampled in Brillouin zone. The crystal structures of bulk  $d$ Lieb-MS<sub>2</sub> and related materials were fully optimized with the convergence criteria of  $10^{-5}$  eV for energy and  $0.01 \text{ eV/\AA}$  for force. The total energy was calculated by self-consistent calculations, which were followed by non-self-consistent calculations to calculate the electronic band structures along high-symmetry directions.

Firstly, the total energy was employed to determine the most favorable stacking patterns of bulk  $d$ Lieb-MS<sub>2</sub>. Referring to the symmetry of  $d$ Lieb-MS<sub>2</sub> monolayer, there are eight stacking patterns can be constructed, including AA (Fig. S13a), AB[X<sub>0.5</sub>] (Fig. S13b), AB[Y<sub>0.5</sub>] (Fig. S13c), AB[X<sub>0.5</sub>|Y<sub>0.5</sub>] (Fig. S13d), AB[R<sub>90</sub>] (Fig. S13e), AB[X<sub>0.5</sub>R<sub>90</sub>] (Fig. S13f), AB[Y<sub>0.5</sub>R<sub>90</sub>] (Fig. S13g), AB[X<sub>0.5</sub>|Y<sub>0.5</sub>R<sub>90</sub>] (Fig. S13h) stacking. Here the [X<sub>0.5</sub>] and [Y<sub>0.5</sub>] mean the layer B moving half lattice constant with respect to the layer A along X and Y direction, respectively. The [R<sub>90</sub>] means the layer B rotating by 90°. The combination between the [X<sub>0.5</sub>], [Y<sub>0.5</sub>], and [R<sub>90</sub>] means these operations are performed sequentially. The calculated total energy (Table S2) of bulk  $d$ Lieb-MS<sub>2</sub> with different stacking patterns indicates all of the  $d$ Lieb-MS<sub>2</sub> favorite the AB[X<sub>0.5</sub>|Y<sub>0.5</sub>R<sub>90</sub>] stacking with the space group of P4<sub>2</sub>/nmc, except the AA stacked  $d$ Lieb-FeS<sub>2</sub> with the space group of P $\bar{4}m2$  possessing low total energy. Consequently, the following calculations were conducted on the AB[X<sub>0.5</sub>|Y<sub>0.5</sub>R<sub>90</sub>] stacked  $d$ Lieb-ZrS<sub>2</sub>,  $d$ Lieb-NbS<sub>2</sub>,  $d$ Lieb-MnS<sub>2</sub>,  $d$ Lieb-ReS<sub>2</sub>, and  $d$ Lieb-OsS<sub>2</sub>, as well as the AA stacked  $d$ Lieb-FeS<sub>2</sub>.

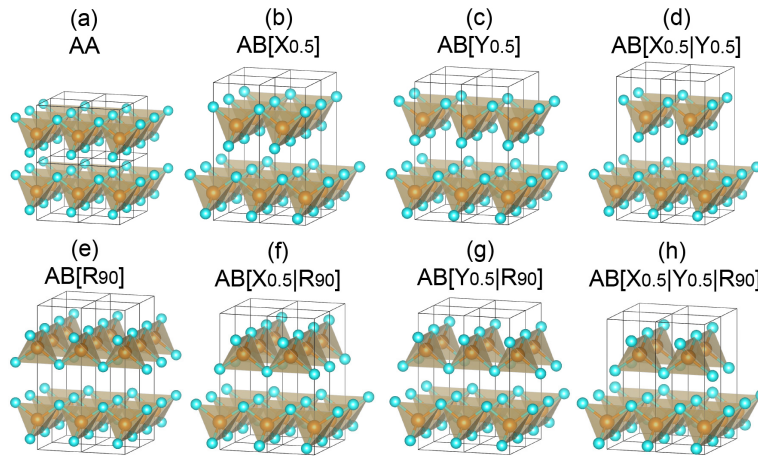

**Figure S13.** The crystal structures of bulk  $d$ Lieb-MS<sub>2</sub> constructed by (a) AA, (b) AB[X<sub>0.5</sub>], (c) AB[Y<sub>0.5</sub>], (d) AB[X<sub>0.5</sub>|Y<sub>0.5</sub>], (e) AB[R<sub>90</sub>], (f) AB[X<sub>0.5</sub>R<sub>90</sub>], (g) AB[Y<sub>0.5</sub>R<sub>90</sub>], and (h) AB[X<sub>0.5</sub>|Y<sub>0.5</sub>R<sub>90</sub>] stacking.

**Table S2.** The energy difference between the ground state pattern and other stacking patterns of bulk  $d$ Lieb-MS<sub>2</sub>. The total energy of ground state pattern is set to 0.00 eV, and the unit of the energy difference is meV/atom.

|                                                           | $d$ Lieb-ZrS <sub>2</sub> | $d$ Lieb-NbS <sub>2</sub> | $d$ Lieb-MnS <sub>2</sub> | $d$ Lieb-FeS <sub>2</sub> | $d$ Lieb-ReS <sub>2</sub> | $d$ Lieb-OsS <sub>2</sub> |
|-----------------------------------------------------------|---------------------------|---------------------------|---------------------------|---------------------------|---------------------------|---------------------------|
| <b>AA</b>                                                 | 1.94                      | 3.96                      | 0.54                      | 0.00                      | 8.05                      | 5.72                      |
| <b>AB[X<sub>0.5</sub>]</b>                                | 24.94                     | 23.48                     | 38.88                     | 21.96                     | 36.55                     | 36.73                     |
| <b>AB[Y<sub>0.5</sub>]</b>                                | 24.94                     | 23.48                     | 38.88                     | 21.96                     | 36.55                     | 36.73                     |
| <b>AB[X<sub>0.5</sub> Y<sub>0.5</sub>]</b>                | 39.39                     | 37.97                     | 73.44                     | 41.01                     | 62.40                     | 67.78                     |
| <b>AB[R<sub>90</sub>]</b>                                 | 42.15                     | 40.01                     | 89.66                     | 68.26                     | 67.21                     | 76.87                     |
| <b>AB[X<sub>0.5</sub> R<sub>90</sub>]</b>                 | 26.12                     | 23.18                     | 47.25                     | 20.78                     | 40.96                     | 39.70                     |
| <b>AB[Y<sub>0.5</sub> R<sub>90</sub>]</b>                 | 26.12                     | 23.18                     | 47.25                     | 20.78                     | 40.96                     | 39.70                     |
| <b>AB[X<sub>0.5</sub> Y<sub>0.5</sub> R<sub>90</sub>]</b> | 0.00                      | 0.00                      | 0.00                      | 4.33                      | 0.00                      | 0.00                      |

Next, the formation energy  $E_{\text{form}}$  of bulk  $d$ Lieb-MS<sub>2</sub> was calculated to demonstrate their experimental feasibility. The  $E_{\text{form}}$  is defined as  $E_{\text{form}} = (E_{\text{total}} - \mu_{\text{M}} - 2E_{\text{S}})/3$ , where the  $E_{\text{total}}$  is the total energy of bulk  $d$ Lieb-MS<sub>2</sub> per MS<sub>2</sub> unit and the  $E_{\text{S}}$  is the energy of S atom in bulk S<sub>6</sub>. The energy of M atom  $\mu_{\text{M}}$  is evaluated by  $\mu_{\text{M}} = E_{\text{M}}/2$ , where  $E_{\text{M}}$  is the total energy per primitive cell of body-center-cubic bulk M (M=Nb, Mn, and Fe) or of hexagonal bulk M (M=Zr, Re, and Os). To verify the correctness of our calculation, we calculated the formation energy of 2H-MoS<sub>2</sub> to be 2.85 eV per MoS<sub>2</sub> unit, which is in agreement with the previously reported 2.88 eV<sup>16</sup>. We also calculated the formation energy of 1T-MoS<sub>2</sub>, 2H-WS<sub>2</sub>, and 1T-WS<sub>2</sub> for comparison, where the  $\mu_{\text{M}}$  is evaluated by  $\mu_{\text{M}} = E_{\text{M}}/2$  and  $E_{\text{M}}$  is the total energy per primitive cell of body-center-cubic bulk M (M=Mo and W). The calculated formation energies for different TMDCs were summarized in Fig. S14. One can clearly see the formation energies are all negative except  $d$ Lieb-OsS<sub>2</sub>, indicating the feasibility of preparing the bulk  $d$ Lieb-MS<sub>2</sub> (M=Zr, Nb, Mn, Fe, and Re) in experiments. Since the OsS<sub>2</sub> monolayer constructed by pentagonal rings<sup>17</sup> is 0.19 eV/atom higher than the energy of  $d$ Lieb-OsS<sub>2</sub> monolayer with dynamic, mechanical, and thermodynamic stability, we hope the bulk  $d$ Lieb-OsS<sub>2</sub> with extremely small positive  $E_{\text{form}}$  to be exist because of its thermodynamic stability at room temperature (Fig. 15f). Even through the  $E_{\text{form}}$  of  $d$ Lieb-ZrS<sub>2</sub> (Fig. S14a),  $d$ Lieb-NbS<sub>2</sub> (Fig. S14b),  $d$ Lieb-ReS<sub>2</sub> (Fig. S14e) is respectively higher than that of the synthesized 1T- ZrS<sub>2</sub>, 1T-NbS<sub>2</sub>, d1T''-ReS<sub>2</sub>, the energy difference is comparable to that between the synthesized 1T- and 2H-MoS<sub>2</sub> (Fig. S14g) or that between the synthesized 1T- and 2H-WS<sub>2</sub> (Fig. S14h). We thus expect the  $d$ Lieb-MS<sub>2</sub> to be experimentally synthesized under special condition.

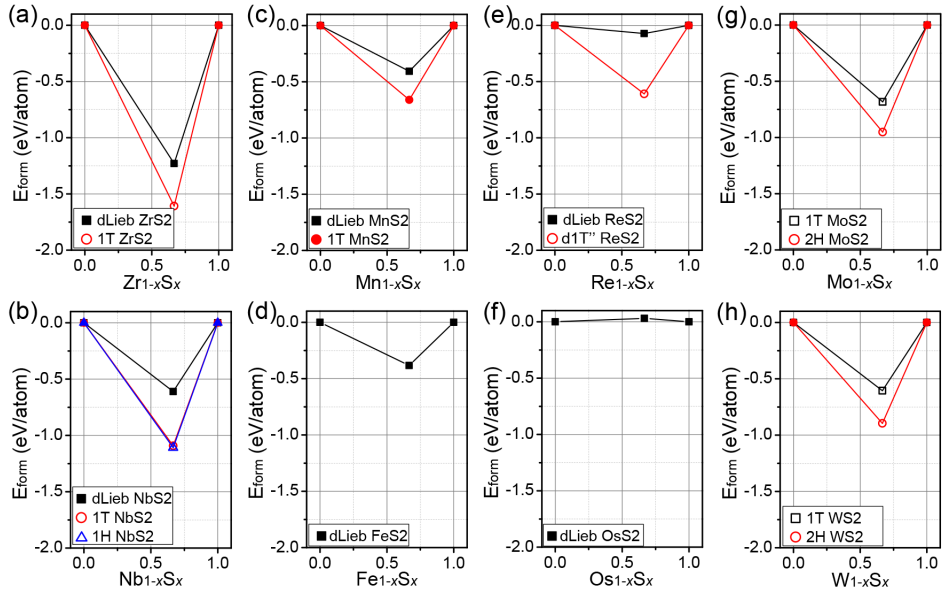

**Figure S14.** The convex hull of formation energy for the bulk *d*Lieb-MS<sub>2</sub> and related TMDCs. The opened symbols mean the corresponding TMDC was experimentally synthesized.

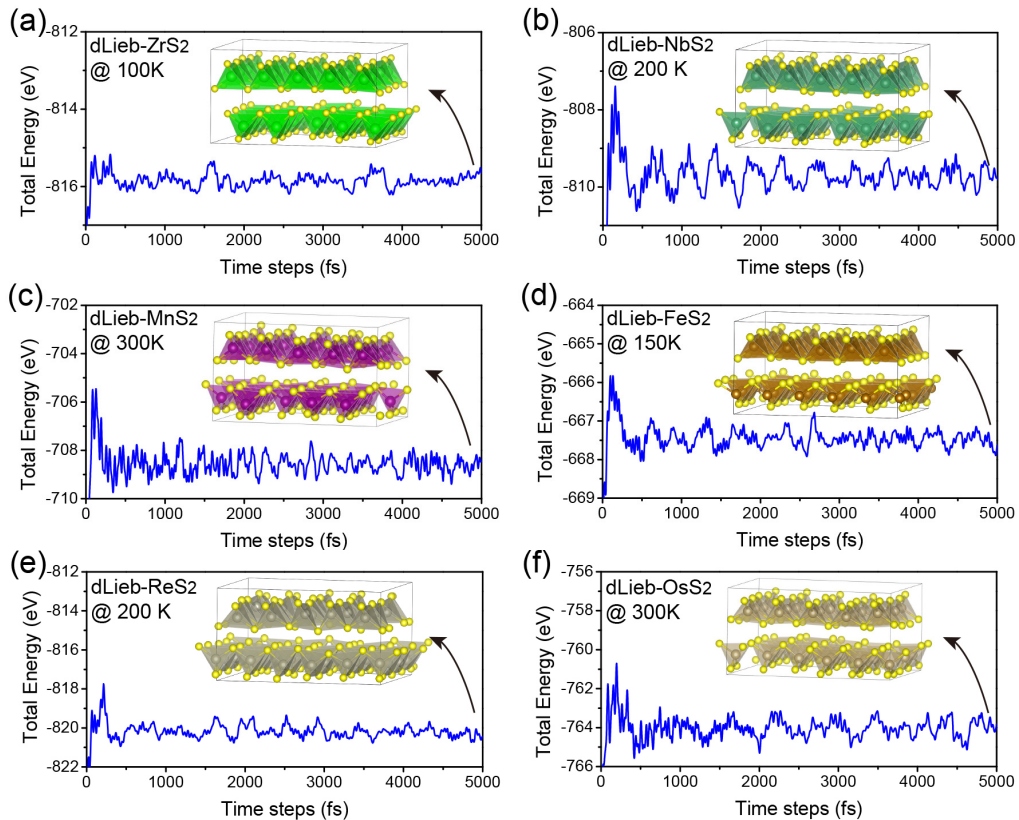

**Figure S15.** The variations of the total energy during the AIMDs for the (a) bulk *d*Lieb-ZrS<sub>2</sub> at 100 K, (b) bulk *d*Lieb-NbS<sub>2</sub> at 200 K, (c) bulk *d*Lieb-MnS<sub>2</sub> at 300 K, (d) bulk *d*Lieb-FeS<sub>2</sub> at 150 K, (e) bulk *d*Lieb-ReS<sub>2</sub> at 200 K, and (f) bulk *d*Lieb-OsS<sub>2</sub> at 300 K. The insets are the crystal structures after simulating 5000 fs.

The thermodynamic stability of bulk  $d\text{Lieb-MS}_2$  at finite-temperature has been checked by AIMD<sup>8</sup>, which ran for 5000 fs with the time step of 1 fs under the NVT ensemble and was implemented in the VASP<sup>7</sup>. The AIMDs were simulated at the temperatures of 50, 100, 150, 200, 250, and 300 K, which were controlled by the Nose-Hoover thermostat. We only show the simulated results (Fig. S15) of maximum temperature at which the bulk  $d\text{Lieb-MS}_2$  can be stabilized. One can clearly see simulated total energy converges well and the crystal structures are well maintained for the  $d\text{Lieb-ZrS}_2$  at 100 K (Fig. S15a), the  $d\text{Lieb-NbS}_2$  at 200 K (Fig. S15b), the  $d\text{Lieb-MnS}_2$  at 300 K (Fig. S15c), the  $d\text{Lieb-FeS}_2$  at 150 K (Fig. S15d), the  $d\text{Lieb-ReS}_2$  at 200 K (Fig. S15e), and the  $d\text{Lieb-OsS}_2$  at 300 K (Fig. S15f), indicating their thermodynamic stability. It should mention that the lower stabilized temperatures of bulk  $d\text{Lieb-NbS}_2$ , bulk  $d\text{Lieb-FeS}_2$ , and bulk  $d\text{Lieb-ReS}_2$  than that of their monolayer counterparts (Fig. S2) can be attributed to the interlayer interactions in bulk  $d\text{Lieb-MS}_2$ .

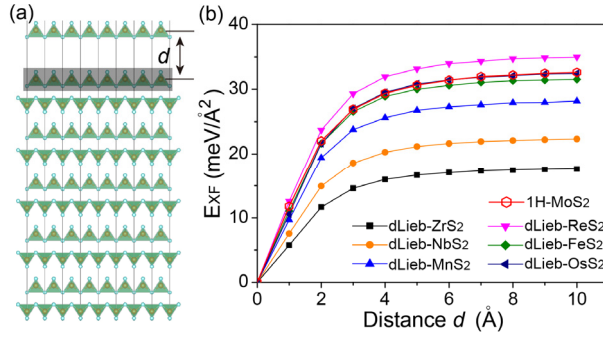

**Figure S16.** (a) The crystal structure of  $d\text{Lieb-MS}_2$  slab used to calculating exfoliation energy  $E_{\text{XF}}$ , where the topmost monolayer is separated from the rest by the distance of  $d$ . (b) The calculated exfoliation energy of  $d\text{Lieb-MS}_2$  monolayer compared with that of 1H-MoS<sub>2</sub> monolayer.

Then, we calculated the exfoliation energy  $E_{\text{XF}}$  to evaluate the cost of removing a single layer from the surface of the bulk compound, which is defined as  $E_{\text{XF}} = (E_{n-1} + E_1 - E_n)/A$ . Here  $A$  is the area of the  $d\text{Lieb-MS}_2$  slab.  $E_n$  is the total energy of  $d\text{Lieb-MS}_2$  slab consisting of  $n$  layers of  $d\text{Lieb-MS}_2$ , and the  $E_{n-1} + E_1$  is total energy of the  $d\text{Lieb-MS}_2$  slab with one  $d\text{Lieb-MS}_2$  layer being separated from the rest ( $n-1$ ) layers (Fig. S16a). The correctness of our calculation was verified by calculating the  $E_{\text{XF}}$  of 1H-MoS<sub>2</sub> monolayer to be  $32.59 \text{ meV}/\text{\AA}^2$ , which is in agreement with the previously reported  $30.82 \text{ meV}/\text{\AA}^2$ <sup>18</sup>. Our calculated  $E_{\text{XF}}$  are smaller than that of 1H-MoS<sub>2</sub> monolayer for most  $d\text{Lieb-MS}_2$  monolayer (Fig. S16b), which demonstrates the feasibility of exfoliating  $d\text{Lieb-MS}_2$  monolayer from its bulk counterparts.

Lastly, we present the electronic band structures of the  $\text{AB}[\text{X}_{0.5}|\text{Y}_{0.5}|\text{R}_{90}]$  stacked  $d\text{Lieb-MS}_2$  ( $\text{Mn}=\text{Zr}, \text{Nb}, \text{Re}, \text{Os}$ ) and AA stacked  $d\text{Lieb-FeS}_2$  in Fig. S17. One can see the stacking do not eliminate the band gap of  $d\text{Lieb-ZrS}_2$  and do not destroy the metallicity of  $d\text{Lieb-MS}_2$  ( $\text{M}=\text{Nb}, \text{Fe}, \text{Re}, \text{Os}$ ). Because the space group of  $\text{P4}_2/\text{nmc}$  is centrosymmetric, the band structures of  $\text{AB}[\text{X}_{0.5}|\text{Y}_{0.5}|\text{R}_{90}]$  stacked  $d\text{Lieb-ZrS}_2$  (Fig. S17a),  $d\text{Lieb-NbS}_2$  (Fig. S17b),  $d\text{Lieb-ReS}_2$  (Fig. S17d), and  $d\text{Lieb-OsS}_2$  (Fig. S17e) are at least doubly degenerated, while the degeneracy is removed in certain band lines



of AA stacked  $d\text{Lieb-FeS}_2$  (Fig. S17c) with the non-centrosymmetric space group of  $P\bar{4}m2$ . The magnetic  $d\text{Lieb-MnS}_2$  also tends to form the  $\text{AB}[X_{0.5}Y_{0.5}|R_{90}]$  stacking, which is 0.54 meV/atom lower than that the AA stacked  $d\text{Lieb-MnS}_2$  (Table S2). Considering the small energy difference, we respectively plot the band structures of AA and  $\text{AB}[X_{0.5}Y_{0.5}|R_{90}]$  stacked  $d\text{Lieb-MnS}_2$  in Fig. S18a-b and S18c-d. Clearly, the magnetic property of  $d\text{Lieb-MnS}_2$  is well preserved for both stacking patterns, and the band structures without (Fig. S18a and S18c) and with (Fig. S18b and S18d) considering spin-orbit coupling are qualitatively consistent with each other.

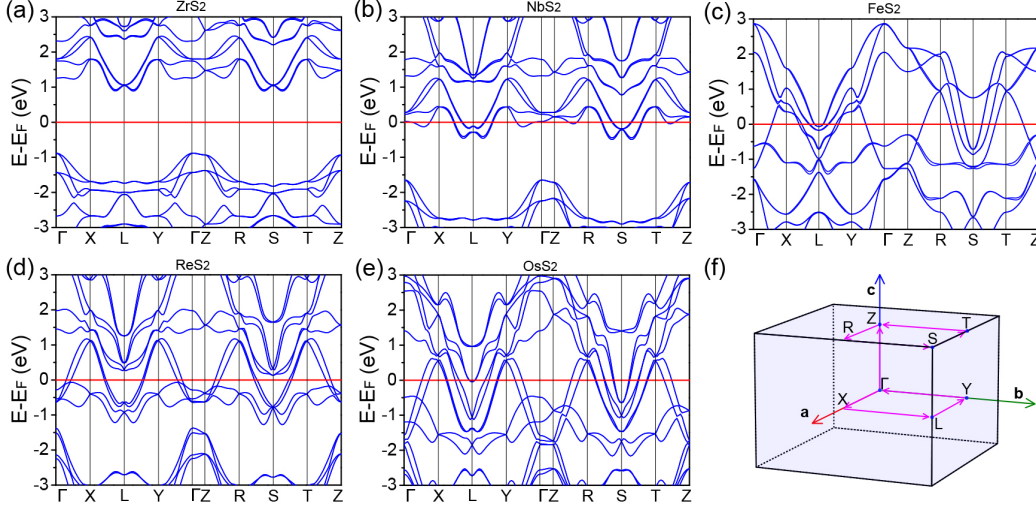

**Figure S17.** The electronic band structure of (a)  $\text{AB}[X_{0.5}Y_{0.5}|R_{90}]$  stacked  $d\text{Lieb-ZrS}_2$ , (b)  $\text{AB}[X_{0.5}Y_{0.5}|R_{90}]$  stacked  $d\text{Lieb-NbS}_2$ , (c) AA stacked  $d\text{Lieb-FeS}_2$ , (d)  $\text{AB}[X_{0.5}Y_{0.5}|R_{90}]$  stacked  $d\text{Lieb-ReS}_2$ , (e)  $\text{AB}[X_{0.5}Y_{0.5}|R_{90}]$  stacked  $d\text{Lieb-OsS}_2$ . (f) The Brillouin zone of bulk  $d\text{Lieb-MS}_2$  and the  $\mathbf{k}$ -point paths used to calculate electronic band structures.

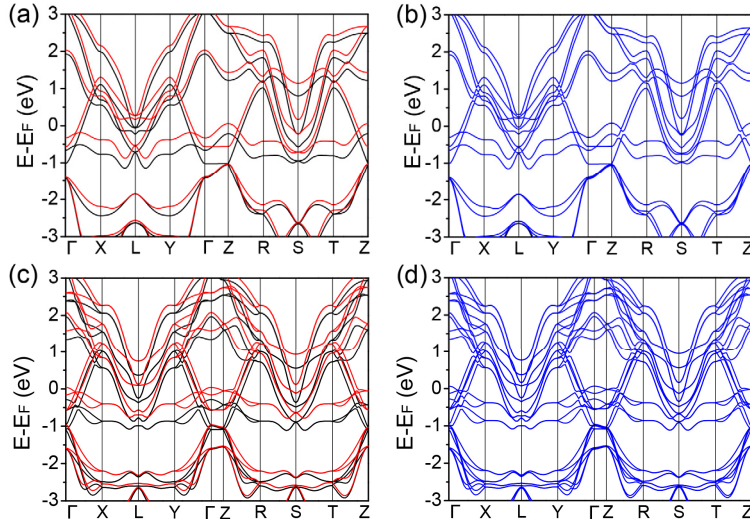

**Figure S18.** The electronic band structure of (a, b) AA stacked and (c, d)  $\text{AB}[X_{0.5}Y_{0.5}|R_{90}]$  stacked  $d\text{Lieb-MnS}_2$  (a, c) without and (b, d) with considering spin-orbit coupling.

## References

- 1 P. Giannozzi, O. Basergio, P. Bonfà, D. Brunato, R. Car, I. Carnimeo, C. Cavazzoni, S. de Gironcoli, P. Delugas, F. Ferrari Ruffino, A. Ferretti, N. Marzari, I. Timrov, A. Urru and S. Baroni, *J. Chem. Phys.*, 2020, **152**, 154105.
- 2 P. Hohenberg and W. Kohn, *Phys. Rev.*, 1964, **136**, B864-B871.
- 3 W. Kohn and L. J. Sham, *Phys. Rev.*, 1965, **140**, A1133-A1138.
- 4 S. Baroni, S. de Gironcoli, A. Dal Corso and P. Giannozzi, *Rev. Mod. Phys.*, 2001, **73**, 515-562.
- 5 J. P. Perdew, K. Burke and M. Ernzerhof, *Phys. Rev. Lett.*, 1996, **77**, 3865-3868.
- 6 P. E. Blöchl, *Phys. Rev. B*, 1994, **50**, 17953-17979.
- 7 G. Kresse and J. Furthmüller, *Comput. Mater. Sci.*, 1996, **6**, 15-50.
- 8 S. Nosé, *J. Chem. Phys.*, 1984, **81**, 511-519.
- 9 M. N. Gjerding, A. Taghizadeh, A. Rasmussen, S. Ali, F. Bertoldo, T. Deilmann, N. R. Knøsgaard, M. Kruse, A. H. Larsen, S. Manti, T. G. Pedersen, U. Petralanda, T. Skovhus, M. K. Svendsen, J. J. Mortensen, T. Olsen and K. S. Thygesen, *2D Mater.*, 2021, **8**, 044002.
- 10 W. Jiang, H. Huang and F. Liu, *Nat. Commun.*, 2019, **10**, 2207.
- 11 B. Cui, X. Zheng, J. Wang, D. Liu, S. Xie and B. Huang, *Nat. Commun.*, 2020, **11**, 66.
- 12 P. B. Allen, *Phys. Rev. B*, 1972, **6**, 2577-2579.
- 13 W. L. McMillan, *Phys. Rev.*, 1968, **167**, 331-344.
- 14 P. B. Allen and R. C. Dynes, *Phys. Rev. B*, 1975, **12**, 905-922.
- 15 J. A. Flores-Livas, L. Boeri, A. Sanna, G. Profeta, R. Arita and M. Eremets, *Phys. Rep.*, 2020, **856**, 1-78.
- 16 D. Liu, Y. Guo, L. Fang and J. Robertson, *Appl. Phys. Lett.*, 2013, **103**.
- 17 Z.-x. Pang, X.-K. Hu and P. Li, *Chem. Phys.*, 2021, **547**, 111199.
- 18 T. Björkman, A. Gulans, A. V. Krasheninnikov and R. M. Nieminen, *Phys. Rev. Lett.*, 2012, **108**, 235502.
